# Supplementary material
Source: PubMed Central journal article supplement (PMC1690487)
Supplement: 10693825s01.pdf [file 10693825s01.pdf]

This is an appendix to the paper by McLean *et al.* 1999 Scrapie transmission in Britain: a recipe for a mathematical model. *Proc. R. Soc. Lond. B* **266**, 2531-2538.

Electronic appendices are refereed with the paper. However, no attempt has been made to impose a uniform editorial style on the appendix.

### Electronic Appendix A

Cross tabulations of farm distributions across risk groups. Expected numbers are shown in italics. Cells where observed is greater than expected are shown in bold. All distributions are significantly different from expected by  $\chi^2$  analysis.



Table A1 Cross tabulation of farm size with other factors

| Size<br>quartile | L/U/H             |                   |                   | P/C/PC            |                     |                   | Region          |                 |                  |                   |                   |                 |                 |                   |                   |                   | Proportion home bred |                   |                   |                   |                   |                   | Lamb in groups   |                 |                   |                   |                 |                   |                   |
|------------------|-------------------|-------------------|-------------------|-------------------|---------------------|-------------------|-----------------|-----------------|------------------|-------------------|-------------------|-----------------|-----------------|-------------------|-------------------|-------------------|----------------------|-------------------|-------------------|-------------------|-------------------|-------------------|------------------|-----------------|-------------------|-------------------|-----------------|-------------------|-------------------|
|                  | L                 | U                 | H                 | P                 | C                   | PC                | EM              | ER              | NE               | NW                | SC                | SE              | Sh              | SW                | W                 | WM                | YH                   | 1                 | 2                 | 3                 | 4                 | 5                 | 6                | 1               | 2                 | 3                 | 4               | 5                 | 6                 |
| 1                | <b>756</b><br>650 | 241<br>296        | 343<br>394        | <b>223</b><br>140 | 964<br>998          | 127<br>175        | <b>85</b><br>72 | <b>37</b><br>25 | 58<br>93         | 99<br>140         | 258<br>291        | <b>92</b><br>70 | <b>42</b><br>26 | <b>254</b><br>195 | 303<br>348        | <b>153</b><br>127 | <b>118</b><br>111    | <b>318</b><br>310 | 206<br>278        | <b>286</b><br>278 | <b>385</b><br>267 | 156<br>293        | <b>152</b><br>77 | <b>34</b><br>17 | 549<br>619        | <b>100</b><br>98  | <b>31</b><br>24 | 519<br>566        | <b>204</b><br>113 |
| 2                | <b>798</b><br>694 | <b>325</b><br>316 | 308<br>420        | 121<br>154        | <b>1167</b><br>1094 | 152<br>192        | <b>86</b><br>76 | <b>34</b><br>27 | 84<br>99         | <b>158</b><br>149 | 286<br>308        | 71<br>74        | 27<br>28        | <b>231</b><br>206 | 312<br>368        | <b>146</b><br>134 | <b>151</b><br>118    | <b>404</b><br>329 | <b>349</b><br>295 | 279<br>295        | 244<br>283        | 247<br>311        | 72<br>82         | 16<br>18        | 584<br>670        | 104<br>107        | <b>28</b><br>26 | <b>664</b><br>612 | <b>159</b><br>122 |
| 3                | 672<br>679        | <b>348</b><br>310 | 380<br>411        | 101<br>150        | <b>1129</b><br>1067 | 174<br>187        | <b>84</b><br>76 | 18<br>27        | <b>116</b><br>99 | <b>172</b><br>148 | 270<br>307        | 66<br>74        | 26<br>28        | <b>202</b><br>205 | <b>385</b><br>367 | 131<br>134        | 112<br>118           | <b>333</b><br>328 | <b>339</b><br>294 | <b>317</b><br>293 | 236<br>282        | <b>315</b><br>310 | 49<br>81         | 13<br>18        | 643<br>663        | 105<br>105        | 25<br>25        | <b>679</b><br>606 | 73<br>121         |
| 4                | 422<br>624        | <b>293</b><br>285 | <b>572</b><br>378 | 146<br>147        | 944<br>1045         | <b>286</b><br>184 | 46<br>76        | 17<br>27        | <b>132</b><br>99 | <b>157</b><br>149 | <b>400</b><br>308 | 62<br>74        | 15<br>28        | 125<br>206        | <b>450</b><br>368 | 99<br>134         | 84<br>118            | 241<br>329        | 267<br>295        | 278<br>294        | 251<br>283        | <b>508</b><br>311 | 49<br>82         | 9<br>18         | <b>846</b><br>670 | <b>108</b><br>107 | 16<br>26        | 534<br>612        | 42<br>122         |

Table A2 Cross tabulation of region with other factors

| Region | L/U/H             |                   |                   | P/C/PC            |                   |                   | Proportion homebred |                   |                   |                   |                   |                 | Lamb in groups  |                   |                  |                |                   |                 | Rams bought       |                   |                   |                   |                   | Ewes bought       |                   |                   |
|--------|-------------------|-------------------|-------------------|-------------------|-------------------|-------------------|---------------------|-------------------|-------------------|-------------------|-------------------|-----------------|-----------------|-------------------|------------------|----------------|-------------------|-----------------|-------------------|-------------------|-------------------|-------------------|-------------------|-------------------|-------------------|-------------------|
|        | L                 | U                 | H                 | P                 | C                 | PC                | 1                   | 2                 | 3                 | 4                 | 5                 | 6               | 1               | 2                 | 3                | 4              | 5                 | 6               | 0                 | 1                 | 2                 | 3                 | 4                 | 0                 | 1                 | 2                 |
| EM     | <b>210</b><br>128 | 39<br>58          | 15<br>77          | 22<br>30          | <b>241</b><br>217 | 22<br>38          | <b>91</b><br>62     | <b>78</b><br>56   | <b>62</b><br>56   | 40<br>54          | 19<br>59          | 11<br>15        | 6<br>4          | 60<br>127         | 27<br>20         | <b>7</b><br>5  | <b>165</b><br>116 | <b>31</b><br>23 | 90<br>91          | <b>75</b><br>59   | <b>64</b><br>62   | <b>37</b><br>29   | 37<br>63          | 147<br>176        | <b>63</b><br>49   | <b>93</b><br>79   |
| ER     | <b>90</b><br>45   | 2<br>21           | 1<br>27           | <b>15</b><br>11   | 74<br>81          | 18<br>14          | 21<br>22            | 21<br>20          | <b>27</b><br>20   | 18<br>19          | 14<br>21          | 5<br>5          | 2<br>1          | 17<br>45          | 9<br>7           | <b>10</b><br>2 | <b>45</b><br>41   | <b>22</b><br>8  | <b>38</b><br>32   | <b>30</b><br>21   | 16<br>22          | 8<br>10           | 15<br>22          | 61<br>62          | 18<br>17          | 28<br>28          |
| NE     | <b>164</b><br>161 | 61<br>73          | <b>107</b><br>97  | 31<br>37          | 260<br>266        | <b>59</b><br>47   | <b>119</b><br>81    | <b>80</b><br>72   | <b>78</b><br>72   | 42<br>70          | 61<br>76          | 10<br>20        | 4<br>5          | <b>200</b><br>165 | <b>30</b><br>26  | 5<br>6         | 126<br>150        | 18<br>30        | 104<br>119        | 62<br>76          | <b>85</b><br>80   | <b>41</b><br>38   | <b>104</b><br>82  | 200<br>230        | <b>69</b><br>64   | <b>127</b><br>103 |
| NW     | 208<br>248        | <b>125</b><br>113 | <b>177</b><br>150 | 70<br>57          | 372<br>409        | <b>96</b><br>72   | <b>143</b><br>121   | <b>128</b><br>108 | 89<br>108         | 96<br>105         | 116<br>114        | 14<br>30        | 8<br>8          | <b>337</b><br>250 | 31<br>40         | 10<br>10       | 170<br>228        | 26<br>46        | 170<br>180        | <b>119</b><br>116 | <b>130</b><br>121 | <b>60</b><br>57   | 119<br>124        | 302<br>347        | <b>107</b><br>96  | <b>189</b><br>155 |
| SC     | 203<br>495        | <b>337</b><br>225 | <b>478</b><br>299 | <b>133</b><br>113 | 768<br>808        | <b>162</b><br>142 | 244<br>250          | 191<br>224        | 201<br>224        | <b>226</b><br>216 | <b>275</b><br>236 | <b>74</b><br>61 | 10<br>16        | <b>695</b><br>505 | <b>104</b><br>81 | 18<br>19       | 285<br>461        | 62<br>92        | 302<br>367        | 181<br>235        | 235<br>248        | <b>141</b><br>116 | <b>360</b><br>253 | <b>788</b><br>707 | 151<br>196        | 280<br>316        |
| SE     | <b>258</b><br>129 | 4<br>59           | 4<br>78           | <b>39</b><br>30   | 212<br>214        | 31<br>38          | <b>78</b><br>60     | <b>58</b><br>54   | 45<br>54          | 51<br>52          | 39<br>57          | <b>20</b><br>15 | 3<br>4          | 86<br>122         | 19<br>20         | <b>9</b><br>5  | <b>132</b><br>111 | <b>35</b><br>22 | <b>124</b><br>89  | 44<br>57          | 48<br>60          | 26<br>28          | 53<br>61          | <b>176</b><br>171 | 35<br>47          | <b>84</b><br>77   |
| Sh     | 1<br>48           | 2<br>22           | <b>96</b><br>29   | <b>15</b><br>8    | 48<br>60          | <b>16</b><br>11   | 6<br>23             | 1<br>20           | 11<br>20          | <b>32</b><br>19   | <b>36</b><br>21   | <b>23</b><br>6  | 0<br>1          | <b>91</b><br>46   | 8<br>7           | 0<br>2         | 6<br>42           | 1<br>8          | <b>46</b><br>33   | <b>26</b><br>21   | 23<br>23          | 9<br>11           | 7<br>23           | <b>99</b><br>64   | 8<br>18           | 4<br>29           |
| SW     | <b>605</b><br>368 | 87<br>167         | 66<br>222         | 54<br>82          | <b>642</b><br>585 | 74<br>103         | 125<br>168          | <b>167</b><br>150 | <b>209</b><br>150 | <b>153</b><br>145 | 122<br>158        | 36<br>41        | <b>13</b><br>11 | 179<br>342        | 49<br>55         | 9<br>13        | <b>452</b><br>312 | <b>94</b><br>62 | <b>298</b><br>248 | <b>183</b><br>159 | <b>174</b><br>167 | 55<br>78          | 112<br>170        | 458<br>477        | <b>142</b><br>132 | <b>222</b><br>213 |
| W      | 314<br>603        | <b>393</b><br>274 | <b>533</b><br>364 | <b>144</b><br>124 | 870<br>887        | 153<br>155        | 185<br>298          | 155<br>267        | 245<br>267        | <b>323</b><br>257 | <b>445</b><br>281 | <b>90</b><br>73 | 17<br>19        | <b>679</b><br>600 | 89<br>96         | 16<br>23       | 522<br>548        | 73<br>109       | 383<br>441        | 274<br>282        | <b>310</b><br>297 | <b>143</b><br>139 | <b>352</b><br>303 | <b>968</b><br>848 | 201<br>235        | 293<br>380        |
| WM     | <b>375</b><br>236 | 82<br>107         | 28<br>142         | 35<br>53          | <b>410</b><br>376 | 50<br>66          | <b>137</b><br>109   | <b>162</b><br>98  | 98<br>98          | 66<br>94          | 43<br>103         | 22<br>27        | <b>17</b><br>7  | 100<br>224        | 33<br>36         | 7<br>9         | <b>297</b><br>205 | <b>68</b><br>41 | <b>204</b><br>162 | <b>110</b><br>104 | 95<br>109         | 43<br>51          | 87<br>112         | 256<br>313        | <b>95</b><br>87   | <b>188</b><br>140 |
| YH     | <b>238</b><br>204 | 78<br>93          | 104<br>123        | 34<br>45          | <b>327</b><br>319 | <b>59</b><br>56   | <b>141</b><br>96    | <b>112</b><br>86  | <b>88</b><br>86   | 66<br>83          | 46<br>90          | 11<br>23        | 5<br>6          | 180<br>197        | 22<br>32         | <b>9</b><br>8  | <b>194</b><br>180 | <b>48</b><br>36 | <b>146</b><br>141 | <b>117</b><br>91  | <b>104</b><br>95  | 37<br>45          | 65<br>97          | 210<br>272        | <b>126</b><br>75  | <b>133</b><br>122 |

Table A3 Cross tabulation of proportion home bred with other factors

| Proportion<br>home-<br>bred | L/U/H      |            |            | P/C/PC     |             |            | Lamb in groups |            |            |           |            |            | Rams bought |            |            |            |            | Ewes bought |            |            |
|-----------------------------|------------|------------|------------|------------|-------------|------------|----------------|------------|------------|-----------|------------|------------|-------------|------------|------------|------------|------------|-------------|------------|------------|
|                             | L          | U          | H          | P          | C           | PC         | 1              | 2          | 3          | 4         | 5          | 6          | 0           | 1          | 2          | 3          | 4          | 0           | 1          | 2          |
| 1                           | <b>746</b> | <b>283</b> | 152        | 43         | <b>1086</b> | 33         | <b>42</b>      | 406        | <b>105</b> | <b>24</b> | <b>564</b> | <b>99</b>  | <b>456</b>  | 219        | <b>277</b> | 116        | 228        | 464         | <b>252</b> | <b>580</b> |
|                             | 573        | 261        | 346        | 124        | 883         | 155        | 15             | 534        | 85         | 20        | 489        | 97         | 387         | 252        | 265        | 123        | 269        | 749         | 209        | 338        |
| 2                           | <b>668</b> | <b>257</b> | 88         | 35         | <b>908</b>  | 135        | 2              | 346        | <b>83</b>  | 19        | <b>585</b> | <b>100</b> | 346         | <b>241</b> | <b>247</b> | <b>124</b> | 203        | 398         | <b>237</b> | <b>526</b> |
|                             | 492        | 224        | 297        | 115        | 819         | 144        | 13             | 489        | 78         | 19        | 447        | 89         | 347         | 226        | 237        | 111        | 241        | 671         | 187        | 303        |
| 3                           | <b>540</b> | <b>257</b> | 180        | 51         | <b>812</b>  | <b>176</b> | 7              | 394        | 73         | <b>20</b> | <b>521</b> | <b>103</b> | 328         | <b>262</b> | <b>255</b> | 102        | 213        | 504         | <b>281</b> | <b>375</b> |
|                             | 474        | 216        | 287        | 111        | 789         | 138        | 13             | 482        | 76         | 18        | 441        | 88         | 346         | 226        | 237        | 110        | 241        | 671         | 187        | 303        |
| 4                           | 374        | 207        | <b>355</b> | <b>164</b> | 614         | <b>202</b> | 7              | <b>512</b> | 61         | <b>24</b> | 382        | <b>97</b>  | 301         | <b>248</b> | 226        | <b>111</b> | 230        | <b>773</b>  | <b>202</b> | 141        |
|                             | 454        | 207        | 275        | 105        | 745         | 131        | 13             | 467        | 74         | 18        | 427        | 85         | 333         | 217        | 228        | 106        | 232        | 645         | 180        | 291        |
| 5                           | 231        | 164        | <b>668</b> | <b>220</b> | 629         | <b>168</b> | 7              | <b>778</b> | 68         | 11        | 276        | 52         | 231         | 214        | <b>257</b> | <b>133</b> | <b>391</b> | <b>1180</b> | 33         | 13         |
|                             | 516        | 235        | 312        | 109        | 773         | 136        | 14             | 514        | 81         | 20        | 470        | 93         | 366         | 239        | 250        | 117        | 254        | 709         | 197        | 320        |
| 6                           | 86         | 37         | <b>155</b> | <b>78</b>  | 148         | 22         | <b>7</b>       | <b>181</b> | <b>25</b>  | 2         | 66         | <b>25</b>  | <b>214</b>  | 38         | 20         | 12         | 38         | <b>312</b>  | 6          | 4          |
|                             | 135        | 61         | 82         | 27         | 188         | 33         | 4              | 132        | 21         | 5         | 121        | 24         | 96          | 63         | 66         | 31         | 67         | 186         | 52         | 84         |

Table A4 Cross tabulation of Lambing groups with other factors

| Lamb<br>in<br>groups | L/U/H       |            |             | P/C/PC     |             |            | Rams bought |            |            |            |            | Ewes bought |            |            |
|----------------------|-------------|------------|-------------|------------|-------------|------------|-------------|------------|------------|------------|------------|-------------|------------|------------|
|                      | L           | U          | H           | P          | C           | PC         | 0           | 1          | 2          | 3          | 4          | 0           | 1          | 2          |
| 1                    | <b>39</b>   | 14         | 18          | 7          | <b>63</b>   | 4          | <b>59</b>   | 10         | 9          | 2          | 6          | <b>54</b>   | 12         | 20         |
|                      | 35          | 16         | 21          | 8          | 56          | 10         | 26          | 17         | 18         | 8          | 18         | 50          | 14         | 23         |
| 2                    | 576         | <b>496</b> | <b>1173</b> | <b>302</b> | 1590        | <b>304</b> | 720         | 439        | 507        | <b>266</b> | <b>706</b> | <b>1765</b> | 341        | 532        |
|                      | 1098        | 493        | 653         | 236        | 1665        | 295        | 783         | 515        | 538        | 253        | 550        | 1525        | 422        | 691        |
| 3                    | 177         | <b>105</b> | 83          | 28         | <b>306</b>  | 45         | <b>127</b>  | 75         | 83         | <b>48</b>  | <b>90</b>  | 230         | <b>71</b>  | <b>122</b> |
|                      | 179         | 80         | 106         | 41         | 287         | 51         | 126         | 83         | 86         | 41         | 88         | 245         | 68         | 111        |
| 4                    | <b>54</b>   | <b>22</b>  | 10          | <b>16</b>  | 55          | <b>21</b>  | <b>31</b>   | <b>24</b>  | <b>24</b>  | 10         | 12         | 51          | <b>20</b>  | <b>30</b>  |
|                      | 42          | 19         | 25          | 10         | 70          | 12         | 30          | 20         | 21         | 10         | 21         | 58          | 16         | 26         |
| 5                    | <b>1453</b> | 470        | 224         | 167        | <b>1769</b> | 292        | 677         | <b>520</b> | <b>541</b> | <b>237</b> | 436        | 1177        | <b>437</b> | <b>797</b> |
|                      | 1050        | 472        | 625         | 239        | 1689        | 299        | 715         | 470        | 492        | 231        | 503        | 1394        | 386        | 631        |
| 6                    | <b>305</b>  | 63         | 41          | <b>63</b>  | 333         | <b>63</b>  | <b>208</b>  | <b>130</b> | 88         | 25         | 31         | 274         | <b>101</b> | 107        |
|                      | 200         | 90         | 119         | 49         | 348         | 62         | 143         | 94         | 98         | 46         | 101        | 279         | 77         | 126        |
